# Supplementary material for: Highly elastic and flexible transparent conductive films derived from latex copolymerization: P(SSNa-BA-St)/PEDOT/graphene
Source: Royal Society of Chemistry journal article supplement (doi:10.1039/c9ra09099a), 2019-01-01
Supplement: c9ra09099a1.pdf [file c9ra09099a1.pdf]

## Supplementary Information

### **Highly elastic and flexible transparent conductive films derived from latexes copolymerization: P(SSNa-BA-St)/PEDOT/Graphene**

*Bo Huang,<sup>a</sup> Xinxin Luo,<sup>a</sup> Qichao Zou,<sup>a</sup> Suxiao Wang,<sup>\*a</sup> and Jinzhi Zhang<sup>\*a</sup>*

*<sup>a</sup>Ministry of Education Key Laboratory for the Synthesis and Application of Organic Functional Molecules, Hubei Collaborative Innovation Centre for Advanced Organic Chemical Materials, College of Chemistry and Chemical Engineering, Hubei University, Wuhan, 430062, China.*

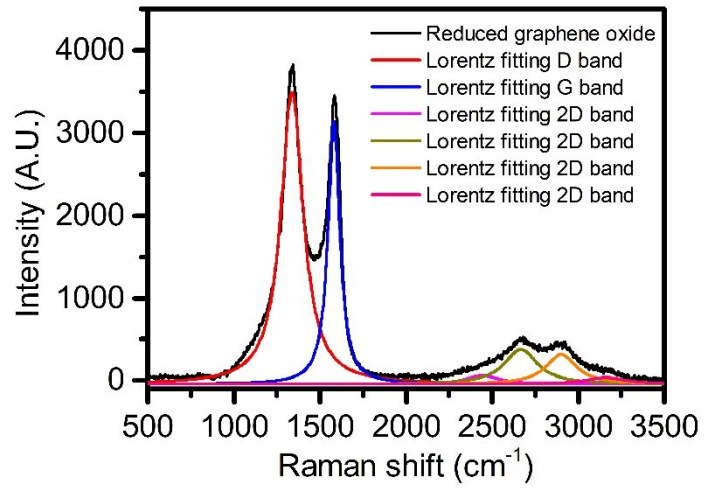

Figure S1. Raman spectrum of the pure Graphene.
